# Supplementary material for: Multi-locus phylogeny of lethal amanitas: Implications for species diversity and historical biogeography
Source: PubMed Central journal article supplement (PMC4094918; doi:10.1186/1471-2148-14-143), 2014-06-21
Supplement: 1471-2148-14-143-S1.pdf [file 1471-2148-14-143-S1.pdf]

**Table S1 Voucher information and GenBank accession numbers of samples used in this study.**

| Taxa                    | Voucher                            | Locality                                               | nrLSU    | ITS      | <i>rpb2</i> | <i>efl-<math>\alpha</math></i> | $\beta$ - <i>tubulin</i> |
|-------------------------|------------------------------------|--------------------------------------------------------|----------|----------|-------------|--------------------------------|--------------------------|
| <b>Ingroup</b>          |                                    |                                                        |          |          |             |                                |                          |
| <i>A. bisporigera</i>   | RET 377-9<br>(duplicate HKAS77811) | Great Smoky Mountains National<br>Park, Tennessee, USA | KJ466434 | KJ466374 | ---         | KJ481936                       | KJ466501                 |
| <i>A. exitialis</i>     | HKAS74673                          | Kunming, Yunnan, China                                 | KJ466435 | KJ466375 | KJ466590    | KJ481937                       | KJ466502                 |
| <i>A. exitialis</i>     | HKAS75774                          | Baiyunshan, Guangdong, China                           | JX998052 | JX998027 | KJ466591    | JX998001                       | KJ466503                 |
| <i>A. exitialis</i>     | HKAS75775                          | Fenghuangshan, Guangdong, China                        | JX998053 | JX998026 | KJ466592    | JX998002                       | KJ466504                 |
| <i>A. exitialis</i>     | HKAS75776                          | Guangzhou, Guangdong, China                            | JX998051 | JX998025 | KJ466593    | JX998003                       | KJ466505                 |
| <i>A. fuliginea</i>     | HKAS75780                          | Fengkai, Guangdong, China                              | JX998048 | JX998023 | KJ466595    | JX997995                       | KJ466507                 |
| <i>A. fuliginea</i>     | HKAS75781                          | Fengkai, Guangdong, China                              | JX998050 | JX998021 | KJ466596    | JX997994                       | KJ466508                 |
| <i>A. fuliginea</i>     | HKAS75782                          | Fengkai, Guangdong, China                              | JX998049 | JX998022 | KJ466597    | JX997996                       | KJ466509                 |
| <i>A. fuliginea</i>     | HKAS77132                          | Fuzhou, Jiangxi, China                                 | KJ466436 | KJ466375 | KJ466598    | KJ481939                       | KJ466510                 |
| <i>A. fuliginea</i>     | HKAS79685                          | Hunan, China                                           | KJ466437 | KJ466376 | KJ466594    | KJ481938                       | KJ466506                 |
| <i>A. fuligineoides</i> | HKAS52727                          | Hunan, China                                           | JX998047 | JX998024 | KJ466599    | ---                            | KJ466511                 |
| <i>A. ocreata</i>       | HKAS79686                          | Contra Costa County, California, USA                   | KJ466442 | KJ466381 | KJ466607    | KJ481947                       | KJ466518                 |
| <i>A. pallidorozea</i>  | HKAS77327                          | Daoxian, Guizhou, China                                | KJ466446 | KJ466386 | KJ466608    | KJ481948                       | KJ466519                 |
| <i>A. pallidorozea</i>  | HKAS61937                          | Taibai Mountain, Shaanxi, China                        | KJ466443 | KJ466382 | KJ466609    | KJ481949                       | KJ466520                 |
| <i>A. pallidorozea</i>  | HKAS71023                          | Hokkaido, Japan                                        | KJ466444 | KJ466383 | KJ466624    | KJ481960                       | KJ466536                 |
| <i>A. pallidorozea</i>  | HKAS75483                          | Shennongjia, Hubei, China                              | KJ466445 | KJ466384 | KJ466623    | KJ481959                       | KJ466535                 |
| <i>A. pallidorozea</i>  | HKAS75783                          | Nujiang, Yunnan, China                                 | JX998055 | JX998035 | KJ466625    | JX998010                       | KJ466537                 |
| <i>A. pallidorozea</i>  | HKAS75784                          | Neixiang, Hennan, China                                | JX998056 | JX998036 | KJ466626    | JX998009                       | KJ466538                 |
| <i>A. pallidorozea</i>  | HKAS75786                          | Tianshui, Gansu, China                                 | JX998054 | JX998037 | KJ466627    | JX998011                       | KJ466539                 |
| <i>A. pallidorozea</i>  | HKAS77329                          | Daoxian, Guizhou, China                                | KJ466447 | KJ466387 | KJ466610    | KJ481950                       | KJ466521                 |
| <i>A. pallidorozea</i>  | HKAS77348                          | Hunan, China                                           | KJ466448 | KJ466387 | KJ466611    | KJ481951                       | KJ466522                 |
| <i>A. pallidorozea</i>  | HKAS77349                          | Mount Tai, Shandong, China                             | KJ466449 | KJ466389 | KJ466628    | KJ481961                       | KJ466540                 |
| <i>A. phalloides</i>    | HKAS75773                          | California, USA                                        | JX998060 | JX998031 | KJ466612    | JX998000                       | KJ466523                 |

|                  |                                     |                                             |          |          |          |          |          |
|------------------|-------------------------------------|---------------------------------------------|----------|----------|----------|----------|----------|
| <i>A. rimosa</i> | HKAS75777                           | Baisha, Hainan, China                       | JX998044 | JX998018 | KJ466615 | JX998005 | KJ466526 |
| <i>A. rimosa</i> | HKAS75778                           | Qiongzong, Hainan, China                    | JX998045 | JX998019 | KJ466616 | JX998006 | KJ466527 |
| <i>A. rimosa</i> | HKAS75779                           | Chebaling, Guangdong, China                 | JX998046 | JX998020 | KJ466617 | JX998004 | KJ466528 |
| <i>A. rimosa</i> | HKAS77105                           | Fuzhou, Jiangxi, China                      | KJ466452 | KJ466391 | KJ466618 | KJ481954 | KJ466529 |
| <i>A. rimosa</i> | HKAS77120                           | Fuzhou, Jiangxi, China                      | KJ466453 | KF479044 | KJ466619 | KJ481955 | KJ466530 |
| <i>A. rimosa</i> | HKAS77279                           | Fengkai, Guangdong, China                   | KJ466454 | KJ466392 | KJ466620 | KJ481956 | KJ466531 |
| <i>A. rimosa</i> | HKAS77335                           | Qiongzong, Hainan, China                    | KJ466455 | KJ466393 | KJ466621 | KJ481957 | KJ466532 |
| <i>A. rimosa</i> | HKAS77336                           | Zhaoqing, Guangdong, China                  | KJ466456 | KJ466394 | KJ466622 | KJ481958 | KJ466533 |
| <i>A. sp. 1</i>  | RET 327-10<br>(duplicate HKAS77812) | Newfoundland and Labrador, Canada           | KJ466458 | KJ466396 | KJ466629 | KJ481962 | KJ466541 |
| <i>A. sp. 1</i>  | RET 368-8<br>(duplicate HKAS77813)  | Newfoundland and Labrador, Canada           | KJ466459 | KJ466397 | ---      | KJ481963 | KJ466542 |
| <i>A. sp. 1</i>  | RET 397-8<br>(duplicate HKAS77814)  | Belleplain State Forest, New Jersey,<br>USA | KJ466460 | KJ466398 | ---      | KJ481964 | KJ466543 |
| <i>A. sp. 1</i>  | RET 480-1<br>(duplicate HKAS77817)  | Franklin County, New York, USA              | KJ466461 | KJ466399 | KJ466630 | KJ481965 | KJ466544 |
| <i>A. sp. 2</i>  | HKAS77350                           | Taiwan, China                               | KJ466462 | KJ466400 | KJ466631 | KJ481966 | KJ466545 |
| <i>A. sp. 3</i>  | HKAS77342                           | Fengkai, Guangdong, China                   | KJ466463 | KF479045 | KJ466632 | KJ481967 | KJ466546 |
| <i>A. sp. 3</i>  | HKAS77343                           | Fengkai, Guangdong, China                   | KJ466464 | KJ466401 | KJ466633 | KJ481968 | KJ466547 |
| <i>A. sp. 3</i>  | HKAS77344                           | Fengkai, Guangdong, China                   | KJ466465 | KJ466402 | KJ466634 | KJ481969 | KJ466548 |
| <i>A. sp. 3</i>  | HKAS77351                           | Taiwan, China                               | KJ466466 | KJ466403 | KJ466635 | KJ481970 | KJ466549 |
| <i>A. sp. 4</i>  | HKAS77326                           | Fengkai, Guangdong, China                   | KJ466467 | KJ466404 | KJ466636 | KJ481971 | KJ466550 |
| <i>A. sp. 4</i>  | HKAS77347                           | Lechang, Guangdong, China                   | KJ466468 | KJ466405 | KJ466637 | KJ481972 | KJ466551 |
| <i>A. sp. 5</i>  | RET 422-8<br>(duplicate HKAS77816)  | Somerset County, New Jersey, USA            | KJ466469 | KJ466406 | KJ466649 | KJ481983 | KJ466563 |
| <i>A. sp. 5</i>  | RET 493-6<br>(duplicate HKAS77822)  | Columbiana County, Ohio, USA                | KJ466470 | KJ466407 | KJ466650 | KJ481984 | KJ466564 |
| <i>A. sp. 6</i>  | HKAS75555                           | Shennongjia, Hubei, China                   | KJ466471 | KJ466408 | KJ466638 | KJ481973 | KJ466552 |

|                         |                                    |                                    |          |          |          |          |          |
|-------------------------|------------------------------------|------------------------------------|----------|----------|----------|----------|----------|
| <i>A. sp. 6</i>         | HKAS77324                          | Taibai Mountain, Shaanxi, China    | KJ466472 | KJ466409 | KJ466639 | KJ481974 | KJ466553 |
| <i>A. sp. 6</i>         | HMJAU20469                         | Changbai Mountain, Jilin, China    | KJ466473 | KJ466410 | KJ466640 | KJ481975 | KJ466554 |
| <i>A. sp. 7</i>         | HKAS77332                          | Qiongzong, Hainan, China           | KJ466474 | KJ466411 | ---      | KJ481992 | KJ466578 |
| <i>A. sp. 7</i>         | HKAS77333                          | Baisha, Hainan, China              | KJ466475 | KJ466412 | KJ466660 | KJ481993 | KJ466579 |
| <i>A. sp. 7</i>         | HKAS77334                          | Lingshui, Hainan, China            | KJ466476 | KJ466413 | KJ466661 | KJ481994 | KJ466580 |
| <i>A. sp. 8</i>         | HKAS75150                          | Gazipur, Bangladesh                | KJ466477 | KJ466414 | KJ466641 | KJ481976 | KJ466555 |
| <i>A. sp. 9</i>         | HKAS77323                          | Fuzhou, Jiangxi, China             | KJ466478 | KJ466415 | KJ466642 | KJ481977 | KJ466556 |
| <i>A. sp. 10</i>        | HKAS77322                          | Tasmania, Australia                | KJ466457 | KJ466395 | KJ466643 | KJ481978 | KJ466557 |
| <i>A. suballiacea</i>   | RET 478-6<br>(duplicate HKAS77819) | Clarion County, Pennsylvania, USA  | KJ466484 | KJ466419 | KJ466600 | KJ481940 | KJ466512 |
| <i>A. suballiacea</i>   | RET 490-1<br>(duplicate HKAS77820) | Middlesex County, Connecticut, USA | KJ466485 | KJ466420 | KJ466601 | KJ481941 | KJ466513 |
| <i>A. suballiacea</i>   | RET 491-7<br>(duplicate HKAS77821) | Macomb County, Michigan, USA       | KJ466486 | KJ466421 | KJ466602 | KJ481942 | KJ466514 |
| <i>A. subjunquillea</i> | HKAS54509                          | Kunming, Yunnan, China             | KJ466487 | KJ466422 | ---      | KJ481985 | KJ466568 |
| <i>A. subjunquillea</i> | HKAS63418                          | Changbai Mountain, Jilin, China    | KJ466488 | KJ466423 | KJ466651 | KJ481986 | KJ466569 |
| <i>A. subjunquillea</i> | HKAS74993                          | Nujiang, Yunnan, China             | KJ466489 | KJ466424 | KJ466652 | KJ481987 | KJ466570 |
| <i>A. subjunquillea</i> | HKAS75770                          | Taibai Mountain, Shaanxi, China    | JX998062 | JX998034 | KJ466653 | JX997999 | KJ466571 |
| <i>A. subjunquillea</i> | HKAS75771                          | Shennongjia, Hubei, China          | JX998063 | JX998032 | KJ466654 | JX997997 | KJ466572 |
| <i>A. subjunquillea</i> | HKAS75772                          | Tianshui, Gansu, China             | JX998061 | JX998033 | KJ466655 | JX997998 | KJ466573 |
| <i>A. subjunquillea</i> | HKAS77325                          | Neixiang, Henan, China             | KJ466490 | KJ466425 | KJ466656 | KJ481988 | KJ466574 |
| <i>A. subjunquillea</i> | HKAS77345                          | Shiyan, Hubei, China               | KJ466491 | KJ466426 | KJ466657 | KJ481989 | KJ466575 |
| <i>A. subjunquillea</i> | HMJAU20412                         | Changbai Mountain, Jilin, China    | KJ466492 | KJ466427 | KJ466658 | KJ481990 | KJ466576 |
| <i>A. subjunquillea</i> | HMJAU23276                         | Helong, Jilin, China               | KJ466493 | KJ466428 | KJ466659 | KJ481991 | KJ466577 |
| <i>A. virosa</i>        | HKAS56694                          | Juva, Finland                      | JX998058 | JX998030 | KJ466664 | JX998007 | KJ466583 |
| <i>A. virosa</i>        | HKAS71040                          | Hokkaido, Japan                    | KJ466496 | KJ466429 | KJ466665 | KJ481997 | KJ466584 |
| <i>A. virosa</i>        | HMJAU20396                         | Changbai Mountain, Jilin, China    | JX998059 | JX998029 | ---      | JX998008 | KJ466585 |
| <i>A. virosa</i>        | HMJAU23303                         | Fusong, Jilin, China               | KJ466497 | KJ466430 | KJ466666 | KJ481998 | KJ466586 |

|                                |            |                           |          |          |          |          |          |
|--------------------------------|------------|---------------------------|----------|----------|----------|----------|----------|
| <i>A. virosa</i>               | HMJAU23304 | Fusong, Jilin, China      | KJ466498 | KJ466431 | KJ466667 | KJ481999 | KJ466587 |
| <b>Outgroup</b>                |            |                           |          |          |          |          |          |
| <i>A. aff. fritillaria</i>     | HKAS56832  | Baoshan, Yunnan, China    | KJ466479 | KJ466372 | KJ466644 | KJ481979 | KJ466558 |
| <i>A. aff. fritillaria</i>     | HKAS57649  | Dali, Yunnan, China       | KJ466480 | KJ466373 | KJ466645 | KJ481980 | KJ466559 |
| <i>A. manginiana</i>           | HKAS56933  | Dali, Yunnan, China       | KJ466438 | KJ466378 | KJ466603 | KJ481943 | KJ466515 |
| <i>A. modesta</i>              | HKAS75405  | Fengkia, Guangdong, China | KJ466439 | KJ466379 | KJ466604 | KJ481945 | KJ466517 |
| <i>A. modesta</i>              | HKAS79688  | Fengkia, Guangdong, China | KJ466440 | ---      | KJ466605 | KJ481944 | KJ466516 |
| <i>A. oberwinklerana</i>       | HKAS77330  | Hainan, China             | KJ466441 | KJ466380 | KJ466606 | KJ481946 |          |
| <i>A. aff. parvipantherina</i> | HKAS56822  | Baoshan, Yunnan, China    | JN941163 | JN943170 | JQ031115 | KJ482005 | KJ466566 |
| <i>A. pseudoporphyrina</i>     | HKAS56984  | Dali, Yunnan, China       | KJ466450 | KC429050 | KJ466614 | KJ481953 | KJ466525 |
| <i>A. pseudoporphyrina</i>     | HKAS57356  | Baoshan, Yunnan, China    | KJ466451 | ---      | KJ466613 | KJ481952 | KJ466524 |
| <i>A. rubrovolvata</i>         | HKAS56744  | Yingjiang, Yunnan, China  | JN943181 | JN943181 | JQ031117 | KJ482002 | KJ466534 |
| <i>A. sp.</i>                  | HKAS77321  | Kunming, Yunnan, China    | KJ466481 | KJ466416 | KJ466646 | ---      | KJ466560 |
| <i>A. sp.</i>                  | HKAS77339  | Inchon, South Korea       | KJ466482 | KJ466417 | KJ466647 | KJ481981 | KJ466561 |
| <i>A. sp.</i>                  | HKAS77340  | Jiujiang, Jiangxi, China  | KJ466483 | KJ466418 | KJ466648 | KJ481982 | KJ466562 |
| <i>A. subfrostiana</i>         | HKAS57042  | Dali, Yunnan, China       | JN941162 | JN943173 | JQ031118 | KJ482003 | KJ466565 |
| <i>A. subglobosa</i>           | HKAS58837  | Lijiang, Yunnan, China    | JN941152 | JN943177 | JQ031121 | KJ482004 | KJ466567 |
| <i>A. vestita</i>              | HKAS79687  | Hainan, China             | KJ466494 | ---      | KJ466662 | KJ481995 | KJ466581 |
| <i>A. virgineoides</i>         | HKAS79691  | Qingdao, Shandong, China  | KJ466495 | ---      | KJ466663 | KJ481996 | KJ466582 |
| <i>A. zangii</i>               | GDGM29241  | Fujian, China             | KJ466499 | KJ466432 | KJ466668 | KJ482000 | KJ466588 |
| <i>A. zangii</i>               | HKAS77331  | Hainan, China             | KJ466500 | KJ466433 | KJ466669 | KJ482001 | KJ466589 |
