# Supplementary material for: Multi-locus phylogeny of lethal amanitas: Implications for species diversity and historical biogeography
Source: PubMed Central journal article supplement (PMC4094918; doi:10.1186/1471-2148-14-143), 2014-06-21
Supplement: 1471-2148-14-143-S2.pdf [file 1471-2148-14-143-S2.pdf]

**Table S2 GenBank accession numbers of the downloaded sequences used in the phylogenetic analyses.** Quotation marks are added to indicate the uncertain taxonomic positions.

| Taxon                                             | ITS      | Locality                           | Source              |
|---------------------------------------------------|----------|------------------------------------|---------------------|
| <b>Ingroup</b>                                    |          |                                    |                     |
| <i>A. arocheae</i>                                | AY325832 | Costa Rica                         | Direct submission   |
| ' <i>A. aff. bisporigera</i> '                    | AY325828 | Costa Rica                         | Direct submission   |
| <i>A. bisporigera</i>                             | EF619625 | Orange County, North Carolina, USA | Parrent et al. 2007 |
| <i>A. bisporigera</i>                             | EU819411 | Wisconsin, USA                     | Palmer et al. 2008  |
| ' <i>A. bisporigera</i> '                         | FJ890028 | Colombia                           | Vagas et al. 2011   |
| ' <i>A. cf. bisporigera</i> '                     | GQ166893 | Cook County, Illinois, USA         | Direct submission   |
| <i>A. fuliginea</i>                               | AB509747 | Yakushima, Japan                   | Direct submission   |
| <i>A. fuligineoides</i>                           | FJ176721 | Hunan, China                       | Zhang et al. 2010   |
| ' <i>A. marmorata</i> subsp. <i>myrtacearum</i> ' | AY325826 | Hawaii, USA                        | Direct submission   |
| ' <i>A. ocreata</i> '                             | AY918962 | Oregon, USA                        | Direct submission   |
| ' <i>A. ocreata</i> '                             | EU909446 | Santa Rosa Island, California, USA | Pringle et al. 2009 |
| <i>A. ocreata</i>                                 | GQ250404 | Sonoma County, California, USA     | Direct submission   |
| ' <i>A. ocreata</i> '                             | GQ250405 | Oregon, USA                        | Direct submission   |
| <i>A. ocreata</i>                                 | GQ486874 | Santa Cruz Island, California, USA | Wolfe et al. 2010   |
| <i>A. pallidorosea</i>                            | FJ176736 | Chongqing, China                   | Zhang et al. 2010   |
| <i>A. phalloides</i>                              | AY325833 | Australia                          | Direct submission   |
| <i>A. phalloides</i>                              | AJ308097 | Voronej region, Russia             | Direct submission   |
| <i>A. phalloides</i>                              | AJ889921 | Denmark                            | Direct submission   |
| <i>A. phalloides</i>                              | EU909443 | Kragero, Norway                    | Pringle et al. 2009 |
| <i>A. phalloides</i>                              | FM203299 | Portugal                           | Direct submission   |
| <i>A. phalloides</i>                              | GQ221841 | New Jersey, USA                    | Wolfe et al. 2010   |
| <i>A. phalloides</i>                              | GU373511 | Finland                            | Direct submission   |
| ' <i>A. phalloides</i> var. <i>umbrina</i> '      | AY325825 | South Africa                       | Direct submission   |

|                                          |          |                     |                     |
|------------------------------------------|----------|---------------------|---------------------|
| <i>A. reidii</i>                         | AY325824 | South Africa        | Direct submission   |
| <i>A. rimosa</i>                         | FJ176728 | Hunan, China        | Zhang et al. 2010   |
| ' <i>A. sp.</i> '                        | FM999697 | Ohio, USA           | Burke et al. 2009   |
| ' <i>A. sp. 1</i> '                      | DQ072729 | Jilin, China        | Zhang et al. 2010   |
| <i>A. suballiacea</i>                    | AY325837 | Texas, USA          | Direct submission   |
| <i>A. subjunquillea</i> var. <i>alba</i> | EF442101 | Yunnan, China       | Li et al. 2007      |
| <i>A. subjunquillea</i> var. <i>alba</i> | EF442102 | Yunnan, China       | Li et al. 2007      |
| <i>A. subjunquillea</i> var. <i>alba</i> | EF442105 | Yunnan, China       | Li et al. 2007      |
| <i>A. subjunquillea</i> var. <i>alba</i> | EF442104 | Yunnan, China       | Li et al. 2007      |
| <i>A. verna</i>                          | EU909448 | France              | Direct submission   |
| ' <i>A. cf. virosa</i> '                 | AY325830 | New Jersey, USA     | Direct submission   |
| ' <i>A. virosa</i> '                     | EU909449 | Virginia, USA       | Pringle et al. 2009 |
| ' <i>A. virosa</i> '                     | EU909450 | North Carolina, USA | Pringle et al. 2009 |
| <i>A. virosa</i>                         | GU373492 | Finland             | Direct submission   |
| <b>Outgroup</b>                          |          |                     |                     |
| <i>A. areolata</i>                       | AB167727 | Japan               | Oda et al. 2004     |
| <i>A. clarisquomosa</i>                  | FJ375331 | Yunnan, China       | Direct submission   |
| <i>A. cylindrispora</i>                  | AY325839 | New Jersey, USA     | Direct submission   |
| <i>A. excelsa</i>                        | AY436453 | Tuebingen, Germany  | Zhang et al. 2004   |
| <i>A. gillbertii</i>                     | AY325838 | Landes, France      | Direct submission   |
| <i>A. griseoturcosa</i>                  | AB167728 | Japan               | Oda et al. 2004     |
| <i>A. kotohiraensis</i>                  | FJ176722 | Hunan, China        | Zhang et al. 2010   |
| <i>A. manginiana</i>                     | AY436463 | Yunnan, China       | Zhang et al. 2010   |
| <i>A. oberwinkelrana</i>                 | FJ176724 | Hunan, China        | Zhang et al. 2010   |
| <i>A. arenaria</i>                       | GQ925388 | Australia           | Justo et al. 2009   |
| <i>A. arenaria</i>                       | GQ925393 | Australia           | Justo et al. 2009   |
| <i>A. rubescens</i>                      | JF313654 | Sweden              | Direct submission   |

---
