# Supplementary material for: Multi-locus phylogeny of lethal amanitas: Implications for species diversity and historical biogeography
Source: PubMed Central journal article supplement (PMC4094918; doi:10.1186/1471-2148-14-143), 2014-06-21
Supplement: 1471-2148-14-143-S4.pdf [file 1471-2148-14-143-S4.pdf]

**Table S3 GenBank accession numbers of the sequences used in the divergence time estimation.**

| Taxon                            | Voucher              | Accession numbers |                |                                |
|----------------------------------|----------------------|-------------------|----------------|--------------------------------|
|                                  |                      | nrLSU             | <i>rpb2</i>    | <i>ef1-<math>\alpha</math></i> |
| <i>Agaricostilbum hyphaenes</i>  | CBS7811              | AY634278          | AY780933       | AY879114                       |
| <i>Amanita muscaria</i>          | GAL2810              | DQ060884          | ---            | EU071872                       |
| <i>Boletellus projectellus</i>   | MB03-118             | AY684158          | AY787218       | AY879116                       |
| <i>Calocera cornea</i>           | GEL5359              | AY701526          | AY536286       | AY881019                       |
| <i>Clavaria zollingeri</i>       | TENN58652            | AY639882          | AY780940       | AY881024                       |
| <i>Coltricia perennis</i>        | DSH93-198            | AF287854          | AY218526       | AY885147                       |
| <i>Cryptococcus humicola</i>     | PYCC 3387T           | DQ645514          | DQ645517       | DQ645519                       |
| <i>Dacryopinax spathularia</i>   | GEL5052              | AY701525          | AY786054       | AY881020                       |
| <i>Fomitiporia mediterranea</i>  | Michael Fischer 3/22 | AY684157          | AY803748       | AY885149                       |
| <i>Fomitopsis pinicola</i>       | MB03-036             | AY684164          | AY786056       | AY885152                       |
| <i>Gautieria otthii</i>          | REG 636              | AF393058          | AY218486       | AY883434                       |
| <i>Hygrocybe conica</i>          | PBM 918              | AY684167          | AY803747       | AY883425                       |
| <i>Hygrophoropsis aurantiaca</i> | MB03-127             | AY684156          | AY786059       | AY883427                       |
| <i>Lactarius deceptivus</i>      | PBM2462              | AY631899          | AY803749       | AY885158                       |
| <i>Marasmius alliaceus</i>       | TENN55620            | AY635776          | AY786060       | AY883431                       |
| <i>Neurospora crassa</i>         | MUCL 19026           | AF286411          | XM_952013      | XM_959775                      |
| <i>Pluteus romellii</i>          | ECV 3201             | AY634279          | AY786063       | AY883433                       |
| <i>Ramaria rubella</i>           | PBM 2408             | AY645057          | AY786064       | AY883435                       |
| <i>Rhizopus stolonifer</i>       | DAOM225708           | DQ273817          | AFTOL database | AFTOL database                 |
| <i>Schizosaccharomyces pombe</i> | Strain972            | Z19136            | NM_00101849    | NM_001022750                   |
| <i>Tricholomopsis decora</i>     | --                   | AY691888          | DQ408112       | DQ029195                       |
| <i>Ustilago maydis</i>           | PBM2469              | AF453938          | AY485636       | AY885160                       |
