# Supplementary material for: Multi-locus phylogeny of lethal amanitas: Implications for species diversity and historical biogeography
Source: PubMed Central journal article supplement (PMC4094918; doi:10.1186/1471-2148-14-143), 2014-06-21

**Figure S2 Results of the HPLC analyses.** The loading amount of the un-standard samples are 20  $\mu$ l.

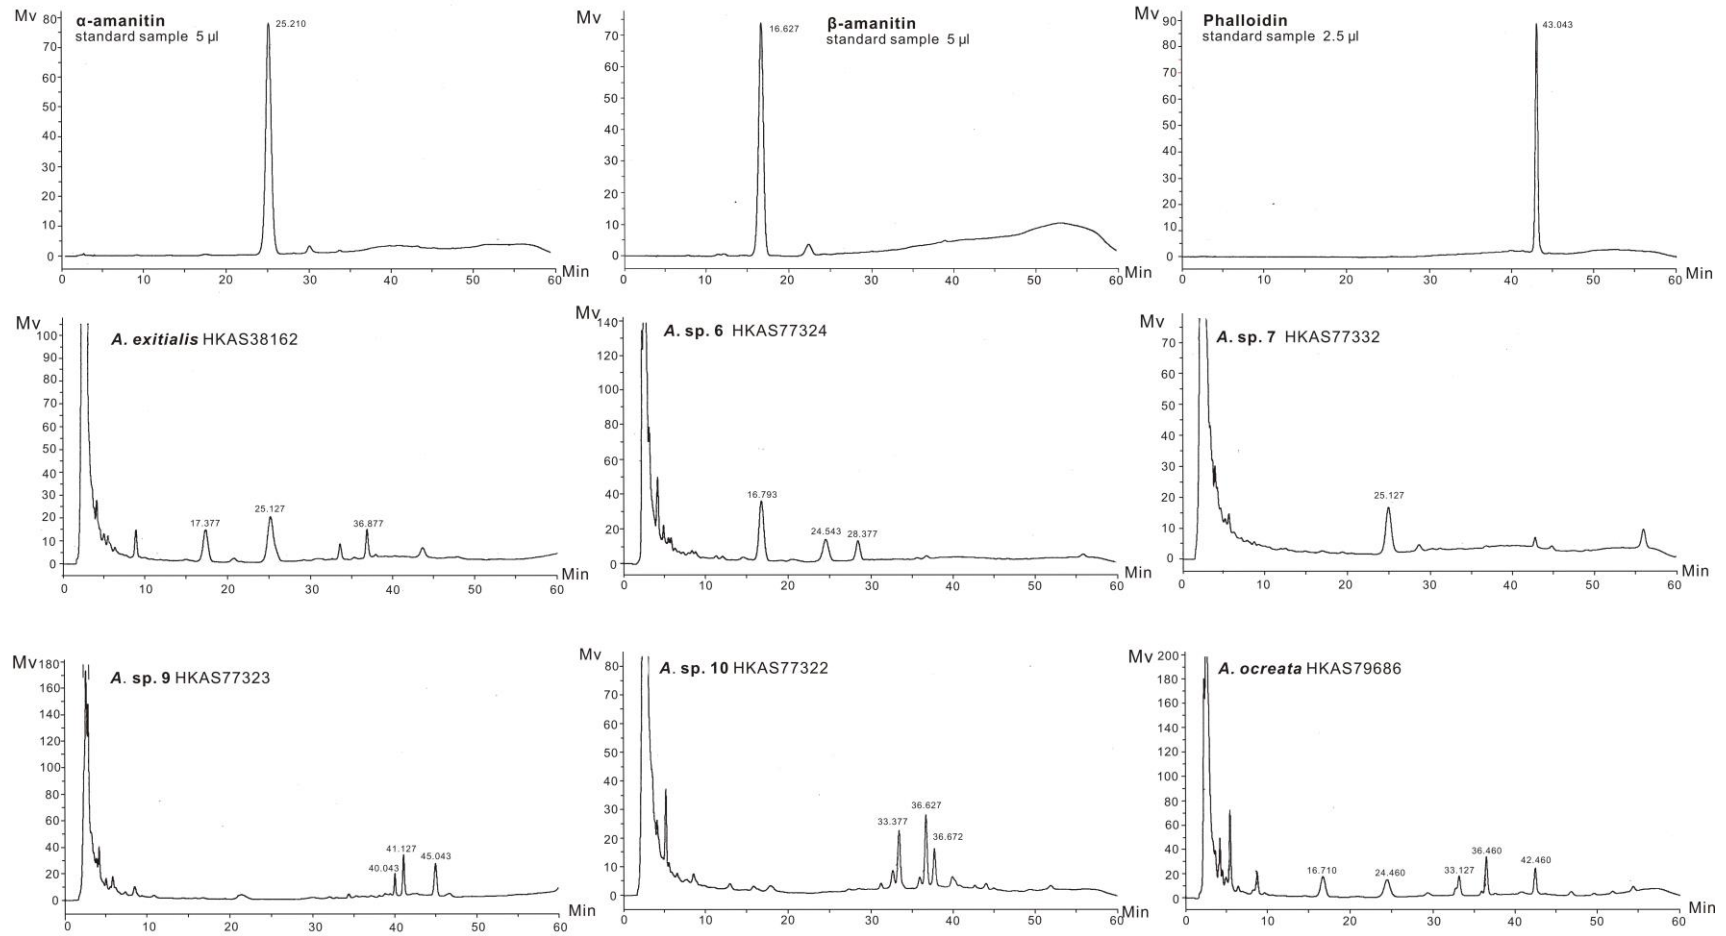

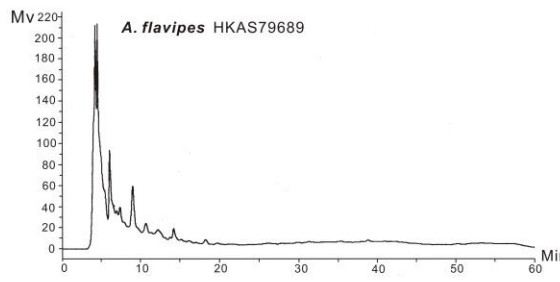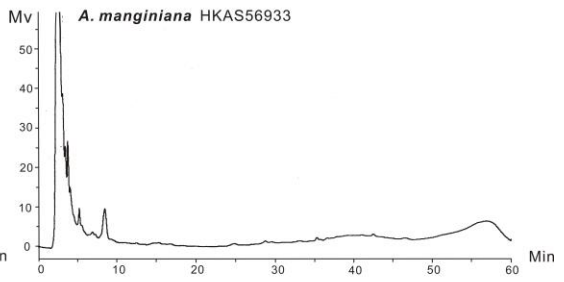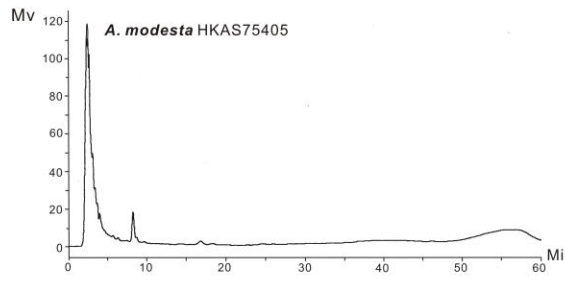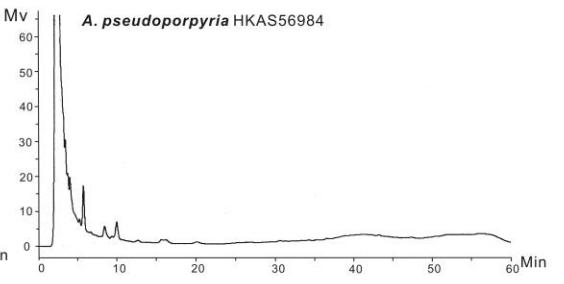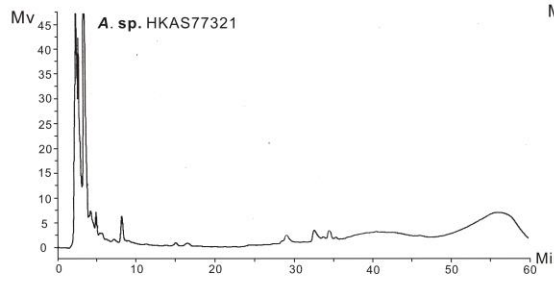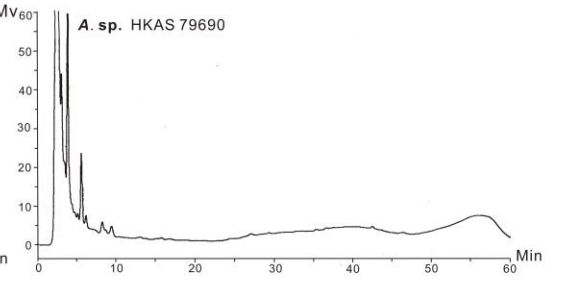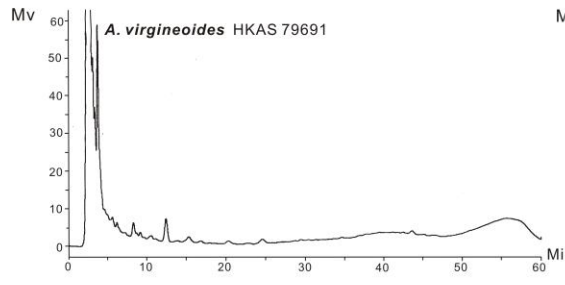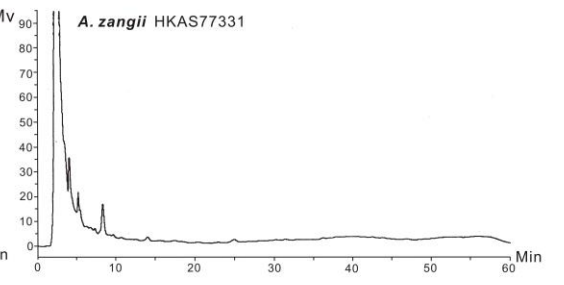

Supplement: 1471-2148-14-143-S6.pdf [file 1471-2148-14-143-S6.pdf]
