# Supplementary material for: Multi-locus phylogeny of lethal amanitas: Implications for species diversity and historical biogeography
Source: PubMed Central journal article supplement (PMC4094918; doi:10.1186/1471-2148-14-143), 2014-06-21

**Figure S3 Chronogram and estimated divergence times of *Amanita* generated from molecular clock analysis using the combined (nrLSU/*rpb2/ef1- $\alpha$* ) dataset.** The chronogram is obtained by using the Ascomycota–Basidiomycota divergence time of 582 Mya as the calibration point. The calibration point and objects of this study are marked in the chronogram. Estimated divergence times of main nodes are summarized in the table at the upper-left corner.

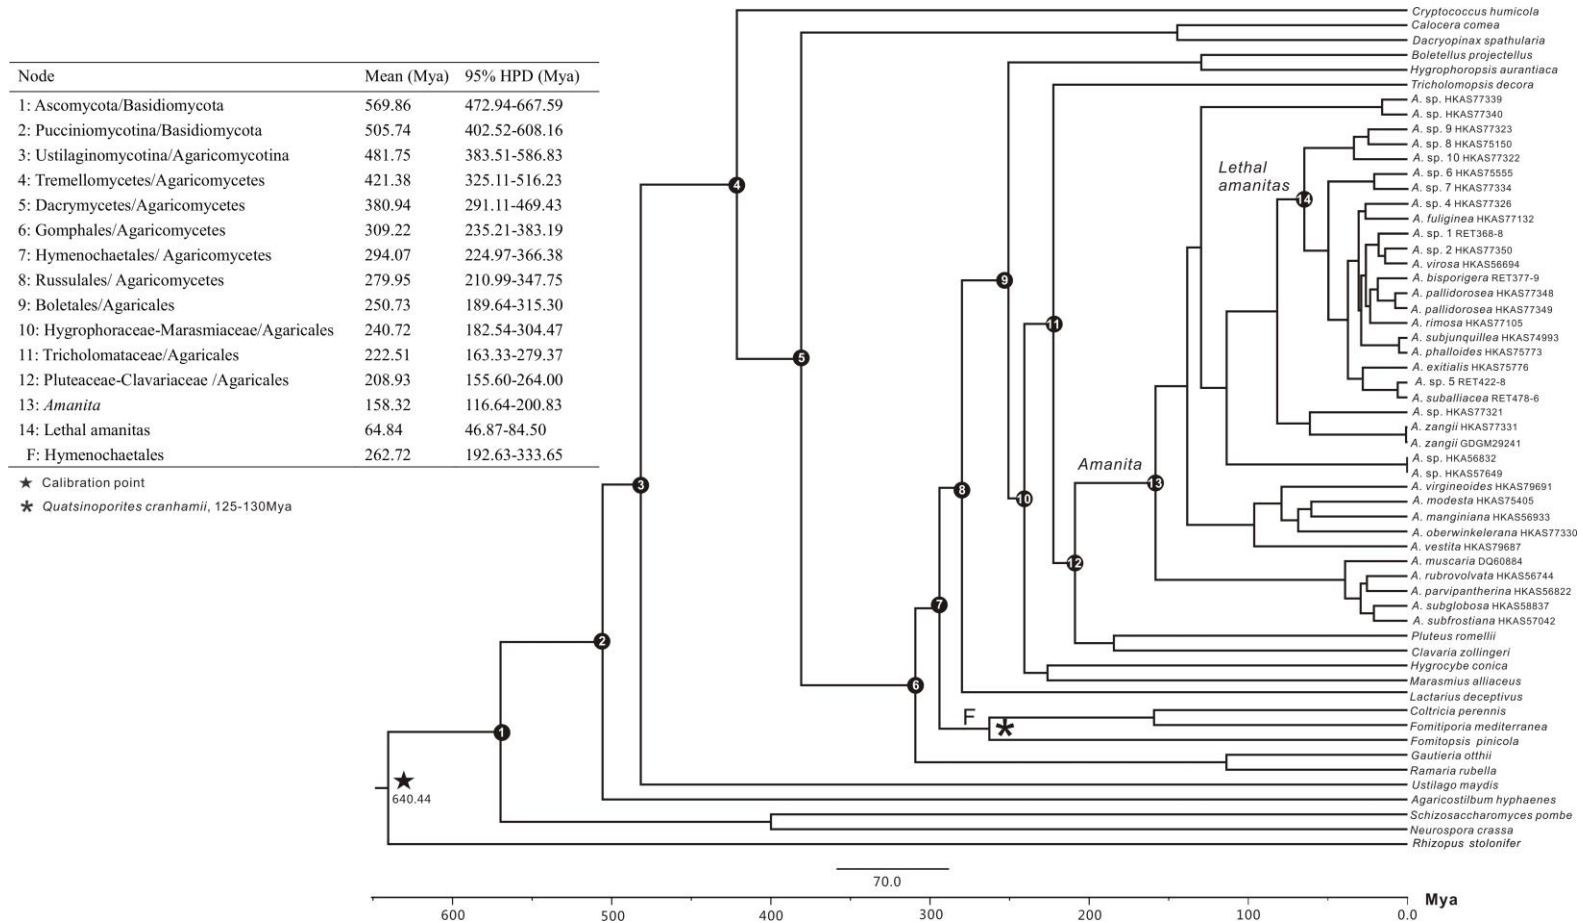

Supplement: 1471-2148-14-143-S7.pdf [file 1471-2148-14-143-S7.pdf]
